# Supplementary material
Source: PubMed Central journal article supplement (PMC6583468)
Supplement: jamapsychiatry-76-31-s001.pdf [file jamapsychiatry-76-31-s001.pdf]

## Supplementary Online Content

Walther A, Breidenstein J, Miller R. Association of testosterone treatment with alleviation of depressive symptoms in men: a systematic review and meta-analysis. *JAMA Psychiatry*. Published online November 14, 2018. doi:10.1001/jamapsychiatry.2018.2734

**eAppendix.** Search Strategy (Extended)

**eTable 1.** Characteristics of Included RCTs

**eTable 2.** Risk of Bias of Included Randomized Controlled Trials

**eTable 3.** Jadad Scoring of Included Randomized Controlled Trials

**eTable 4.** Psychometric Instruments With Cut-off Levels According to Authors

**eTable 5.** Extraction and Derivation of Central Tendency, Dispersion Measures, and Hedges' *g*

**eFigure 1.** Forest Plot of Treatment Acceptability

**eTable 6.** Robust Meta-regression of the Effectiveness of Testosterone Treatment (TT) on Various Study-Level Moderators After Removal of Influential Studies

This supplementary material has been provided by the authors to give readers additional information about their work.

## **eAppendix. Search Strategy (Extended)**

The search was originally carried out on October, 9 2017 and updated on March, 5 2018.

Databases: PubMed/Medline, EMBASE, Scopus, Web of Science, PsycINFO, Cochrane Controlled Trials Register (database inception to 2018 March 5)

---

Exemplary for PubMed Database:

(((testosterone) AND (administration and dosage)) AND mood): 660 hits

(((testosterone) AND (adverse effects)) AND mood): 921 hits

(((testosterone) AND (deficiency)) AND mood): 398 hits

(((testosterone) AND (standards)) AND mood): 45 hits

(((testosterone) AND (therapeutic use)) AND mood): 1417 hits

(((testosterone) AND (therapy)) AND mood): 1487 hits

(((testosterone) AND (treatment)) AND mood): 2581 hits

(((testosterone) AND (supplementation)) AND mood): 181 hits

7690 TOTAL

after removal of duplicates: 3091

after formal assessment (of the excluded: 85 reviews, 2 meta-analyses, 6 case-studies, 2 meeting abstracts, 1 study protocol, 1 twin study, 3 practical guidelines, 2 books): 2989

human studies (without animals): 1392

without women: 874

without children: 837

without athletic studies: 758

without contraceptive studies: 728

without non-testosterone treatments: 548

without in vitro studies: 469

titles and abstracts finally (manually) screened on relevance including only RCTs: 54

without studies using psychometrically non-validated depression measures: 27

**eTable 1. Characteristics of included RCTs**

| Author, year           | Population                              | Duration | Groups (no. randomized)                      | Age, yr, mean (SD) | Baseline total T, mean (SD), nmol/L | Depression scale (baseline mean of TT and placebo group) |
|------------------------|-----------------------------------------|----------|----------------------------------------------|--------------------|-------------------------------------|----------------------------------------------------------|
| <b>Grinspoon, 2000</b> | AIDS wasting syndrome                   | 24 wks   | Placebo (26)<br>IM TE, 300mg/3wk (26)        | 41.7 (1.5)         | 15.6 (1.9)                          | BDI-I 14.8 vs. 16.3                                      |
| <b>Rabkin, 2000</b>    | AIDS wasting syndrome                   | 6 wks    | Placebo (35)<br>IM TC, 400mg/2wk (39)        | 39.0 (8.2)         | 13.1 (4.3)                          | BDI-I 14.2 vs. 13.9                                      |
| <b>Pope, 2000</b>      | Healthy men                             | 6 wks    | Placebo (56)<br>IM TC, up to 600mg/wk (56)   | 27.8               | 16.9 (5.4)                          | HDRS 0.9 vs. 1.0                                         |
| <b>Seidman, 2001</b>   | Hypogonadal and MDD                     | 6 wks    | Placebo (17)<br>IM TE, 200mg/wk (13)         | 52 (10)            | 9.2 (1.8)                           | BDI-I 23.5 vs. 19.3                                      |
| <b>Pope, 2003</b>      | Refractory Depression                   | 8 wks    | Placebo (10)<br>1% gel, 100mg/d (12)         | 49.2 (9.1)         | 9.8 (1.8)                           | BDI-II 23.1 vs. 23.6                                     |
| <b>Malkin, 2004</b>    | Hypogonadal and ischaemic heart disease | 4 wks    | Placebo (10)<br>IM Sustanon*, 100mg/2wk (11) | 60.8 (4.6)         | 4.2 (0.5)                           | BDI-II 9.0 vs. 7.0                                       |
| <b>Pugh, 2004</b>      | Congestive heart failure                | 12 wks   | Placebo (10)<br>IM Sustanon*, 100mg/2wk (10) | 62 (9.3)           | 14.1 (6.3)                          | BDI-II 7.3 vs. 7.3                                       |
| <b>Kenny, 2004</b>     | Mild cognitive impairment               | 12 wks   | Placebo (5)<br>IM TE, 200mg/3wk (6)          | 80 (4.0)           | 14.4 (5.3)                          | GDS-15 2.7 vs. 4.6                                       |
| <b>Rabkin, 2004</b>    | AIDS wasting syndrome and MDD           | 8 wks    | Placebo (39)<br>IM TC, 400mg/2wk (38)        | 41 (7.7)           | 20.6 (9.6)                          | HDRS 17.8 vs. 16.8                                       |
| <b>Cavallini, 2004</b> | Older men symptomatic for low T         | 24 wks   | Placebo (45)<br>Oral TU, 160mg/d (40)        | 63.5 (3.5)         | 10.2 (2.0)                          | BRMS 7.0 vs. 7.0                                         |
| <b>Haren, 2005</b>     | Older men                               | 48 wks   | Placebo (37)<br>Oral TU, 160mg/d (39)        | 68.5 (6)           | 16.2 (4.6)                          | GDS-30 6.3 vs. 5.7                                       |
| <b>Seidman, 2005</b>   | Treatment-resistant depressed men       | 6 wks    | Placebo (13)<br>IM TE, up to 600mg/wk (13)   | 46.4 (10.8)        | 14.5 (7.4)                          | HDRS 22.8 vs. 22.6                                       |
| <b>Orengo, 2005</b>    | MDD                                     | 12 wks   | Placebo (12)<br>1% gel, 50mg/d (12)          | 63 (8.5)           | 9.5 (2.1)                           | HDRS 15.7 vs. 15.7                                       |
| <b>Lu, 2006</b>        | Mild Alzheimer                          | 24 wks   | Placebo (24)                                 | 66.1 (7.7)         | 12.7 (4.0)                          | BDI-I 5.3 vs. 5.6                                        |

|                        |                                                 |                 |                                                                                            |             |                                            |                     |
|------------------------|-------------------------------------------------|-----------------|--------------------------------------------------------------------------------------------|-------------|--------------------------------------------|---------------------|
|                        | Disease and healthy older men                   |                 | 1% gel, 75mg/d (23)                                                                        |             |                                            |                     |
| <b>Vaughan, 2007</b>   | T below the range of normal for young adult men | 144 wks (36 mo) | Placebo (23)<br>IM TE, 200mg/2wk (24)                                                      | 710.8 (4.0) | 10.1 (1.7)                                 | BDI-I 3.3 vs. 5.1   |
| <b>Svartberg, 2008</b> | Older men                                       | 52 wks          | Placebo (18)<br>IM TU, 1000mg/12wk (18)                                                    | 69.0 (5.0)  | 8.3 (1.9)                                  | BDI-II 5.1 vs. 4.8  |
| <b>Seidman, 2009</b>   | Dysthymia                                       | 6 wks           | Placebo (10)<br>IM TC, 200mg/10d (13)                                                      | 50.6 (7.0)  | 11.8 (3.2)                                 | HDRS 14.5 vs. 13.5  |
| <b>Shores, 2009</b>    | Dysthymia or minor depression                   | 12 wks          | Placebo (16)<br>1% gel, 75mg/d (17)                                                        | 59.4 (6.4)  | 9.7 (3.9)                                  | HDRS 12.7 vs. 13.8  |
| <b>Giltay, 2010</b>    | Hypogonadal and metabolic syndrome              | 30 wks          | Placebo (71)<br>IM TU, 1000mg/12wk (113)                                                   | 52.1 (9.7)  | 8.0 (0.5)                                  | BDI-I 9.5 vs. 9.3   |
| <b>Pope, 2010</b>      | Treatment-resistant men with MDD                | 6 wks           | Placebo (49)<br>1% gel, 50mg/d (46)                                                        | 50.3 (7.7)  | 11.6 (1.2)                                 | HDRS 17.3 vs. 18.2  |
| <b>Stout, 2012</b>     | Chronic heart failure                           | 12 wks          | Placebo (20)<br>IM Sustanon*, 100mg/2wk (20)                                               | 67.2 (7.1)  | 10.7 (2.6)                                 | BDI-II 10.4 vs. 7.1 |
| <b>Zhang, 2012</b>     | Positive score on ADAM questionnaire            | 24 wks          | Placebo (Vitamin E/C) (80)<br>Oral TU, 120 or 160mg/d (depending on baseline T level) (80) | 60.3 (6.7)  | 7.9 (0.8)                                  | HADS-D 4.9 vs. 4.8  |
| <b>Hackett, 2013</b>   | Type 2 Diabetes and symptomatic for low T       | 30 wks          | Placebo (102)<br>IM TU, 1000mg/12wk (97)                                                   | 61.6 (9.8)  | 9.1 (3.5)                                  | HADS-D 7.9 vs. 7.3  |
| <b>Mirdamadi, 2014</b> | Congestive heart failure                        | 12              | Placebo (25)<br>IM TE, 250mg/4wk (25)                                                      | 60.5 (5.0)  | Not reported and not otherwise retrievable | BDI-I 4.6 vs. 4.6   |
| <b>Borst, 2014</b>     | Hypogonadal                                     | 52 wks          | Placebo (16)<br>IM TE, 125mg/wk (14)                                                       | 70.0 (8.9)  | 8.8 (2.9)                                  | GDS-15 2.4 vs. 2.1  |
| <b>Cherrier, 2015</b>  | Mild cognitive impairment                       | 24 wks          | Placebo (12)<br>1% gel, 50-100mg/d (10)                                                    | 70.5 (8.2)  | 10.3 (3.0)                                 | GDS-30 7.2 vs. 4.1  |
| <b>Snyder, 2016</b>    | Older men symptomatic for                       | 52 wks          | Placebo (234)<br>1% gel, 50mg/d (230)                                                      | 72.2 (5.8)  | 8.2 (2.3)                                  | PHQ-9 6.6 vs. 6.6   |

|       |  |  |  |  |  |  |
|-------|--|--|--|--|--|--|
| low T |  |  |  |  |  |  |
|-------|--|--|--|--|--|--|

T = testosterone, TT = total testosterone, AIDS = Acquired Immune Deficiency Syndrome, IM = Intramuscular, TC = testosterone cypionate, TE = testosterone enanthate, TRT = testosterone replacement therapy, TU = testosterone undecanoate, wk = week, wks = weeks, MDD = major depressive disorder, ADAM = Androgen Deficiency in Aging Men questionnaire.

\*Blend of testosterone propionate, testosterone phenylpropionate, testosterone isocaproate, and testosterone decanoate.

**eTable 2. Risk of Bias of Included Randomized Controlled Trials**

| <b>Author, year</b>    | <b>Adequate sequence generation</b> | <b>Allocation concealment</b> | <b>Selective Reporting</b> | <b>Blinding of participants and personnel</b> | <b>Blinding of outcome assessment</b> | <b>Incomplete outcome data addressed (efficacy outcomes)</b> | <b>Incomplete outcome data addressed (harm outcomes)</b> |
|------------------------|-------------------------------------|-------------------------------|----------------------------|-----------------------------------------------|---------------------------------------|--------------------------------------------------------------|----------------------------------------------------------|
| <b>Grinspoon, 2000</b> | Low                                 | Low                           | Unclear                    | Low                                           | Low                                   | High                                                         | Unclear                                                  |
| <b>Rabkin, 2000</b>    | Low                                 | Low                           | Low                        | Low                                           | Low                                   | Low                                                          | Low                                                      |
| <b>Pope, 2000</b>      | Unclear                             | Unclear                       | Low                        | Low                                           | Low                                   | Low                                                          | Unclear                                                  |
| <b>Seidman, 2001</b>   | Unclear                             | Unclear                       | Unclear                    | Low                                           | Low                                   | Low                                                          | Low                                                      |
| <b>Pope, 2003</b>      | Low                                 | Low                           | Low                        | Low                                           | Low                                   | Low                                                          | Low                                                      |
| <b>Malkin, 2004</b>    | Low                                 | Unclear                       | Low                        | High                                          | Low                                   | Low                                                          | Low                                                      |
| <b>Pugh, 2004</b>      | Unclear                             | Unclear                       | Unclear                    | Low                                           | Unclear                               | High                                                         | Low                                                      |
| <b>Kenny, 2004</b>     | Unclear                             | Unclear                       | Unclear                    | Unclear                                       | Low                                   | Low                                                          | Low                                                      |
| <b>Rabkin, 2004</b>    | Low                                 | Unclear                       | Unclear                    | Low                                           | Low                                   | Low                                                          | Low                                                      |
| <b>Cavallini, 2004</b> | Unclear                             | Unclear                       | Unclear                    | Low                                           | Unclear                               | Unclear                                                      | High                                                     |
| <b>Haren, 2005</b>     | Low                                 | Unclear                       | Unclear                    | Unclear                                       | High                                  | High                                                         | Low                                                      |
| <b>Seidman, 2005</b>   | Low                                 | Low                           | Unclear                    | Low                                           | Low                                   | Unclear                                                      | High                                                     |
| <b>Orengo, 2005</b>    | Low                                 | Unclear                       | Unclear                    | Low                                           | Unclear                               | High                                                         | High                                                     |
| <b>Lu, 2006</b>        | Unclear                             | Unclear                       | Unclear                    | Unclear                                       | Low                                   | Low                                                          | Low                                                      |
| <b>Vaughan, 2007</b>   | Low                                 | Low                           | Unclear                    | Low                                           | Low                                   | Unclear                                                      | Unclear                                                  |
| <b>Svartberg, 2008</b> | Unclear                             | Unclear                       | Unclear                    | Low                                           | Low                                   | Low                                                          | Unclear                                                  |
| <b>Seidman, 2009</b>   | Low                                 | Low                           | Unclear                    | Low                                           | Low                                   | Low                                                          | Unclear                                                  |
| <b>Shores, 2009</b>    | Low                                 | Low                           | Unclear                    | Low                                           | Low                                   | High                                                         | Unclear                                                  |
| <b>Giltay, 2010</b>    | Unclear                             | Low                           | Unclear                    | Low                                           | Low                                   | Low                                                          | Low                                                      |
| <b>Pope, 2010</b>      | Low                                 | Unclear                       | Low                        | Low                                           | Low                                   | Low                                                          | Low                                                      |
| <b>Stout, 2012</b>     | Unclear                             | Unclear                       | Unclear                    | Unclear                                       | Low                                   | High                                                         | High                                                     |
| <b>Zhang, 2012</b>     | Unclear                             | Low                           | Unclear                    | Low                                           | High                                  | Low                                                          | Low                                                      |
| <b>Hackett, 2013</b>   | Unclear                             | Low                           | Unclear                    | Low                                           | Low                                   | Low                                                          | Low                                                      |
| <b>Mirdamadi, 2014</b> | Unclear                             | Unclear                       | Unclear                    | Low                                           | Unclear                               | Low                                                          | Unclear                                                  |
| <b>Borst, 2014</b>     | Low                                 | Unclear                       | Unclear                    | Low                                           | High                                  | High                                                         | High                                                     |
| <b>Cherrier, 2015</b>  | Unclear                             | Unclear                       | Low                        | Low                                           | Unclear                               | Low                                                          | Low                                                      |
| <b>Snyder, 2016</b>    | Low                                 | Low                           | Low                        | Low                                           | Low                                   | Low                                                          | Low                                                      |

**eTable 3. Jadad Scoring of Included Randomized Controlled Trials**

| Author, year    | Study described as random | Randomization scheme described and appropriate | Study described as double-blind | Method of (double) blinding appropriate | Description of dropouts and withdrawals available | Jadad Score |
|-----------------|---------------------------|------------------------------------------------|---------------------------------|-----------------------------------------|---------------------------------------------------|-------------|
| Grinspoon, 2000 | Yes / Yes                 | No / No                                        | Yes / Yes                       | Yes / Yes                               | Yes / Yes                                         | 3 / 3       |
| Rabkin, 2000    | Yes / Yes                 | Yes / Yes                                      | Yes / Yes                       | Yes / Yes                               | Yes / Yes                                         | 5 / 5       |
| Pope, 2000      | Yes / Yes                 | No / No                                        | Yes / Yes                       | Yes / No                                | Yes / Yes                                         | 3 / 1       |
| Seidman, 2001   | Yes / Yes                 | No / No                                        | Yes / Yes                       | Yes / Yes                               | Yes / Yes                                         | 3 / 3       |
| Pope, 2003      | Yes / Yes                 | Yes / Yes                                      | Yes / Yes                       | Yes / Yes                               | Yes / Yes                                         | 5 / 5       |
| Malkin, 2004    | Yes / Yes                 | Yes / Yes                                      | No / No                         | Yes / No                                | Yes / Yes                                         | 4 / 2       |
| Pugh, 2004      | Yes / Yes                 | No / No                                        | Yes / Yes                       | Yes / No                                | No / No                                           | 2 / 0       |
| Kenny, 2004     | Yes / Yes                 | No / No                                        | Yes / Yes                       | Yes / Yes                               | Yes / Yes                                         | 3 / 3       |
| Rabkin, 2004    | Yes / Yes                 | Yes / Yes                                      | Yes / Yes                       | Yes / No                                | Yes / Yes                                         | 5 / 3       |
| Cavallini, 2004 | Yes / Yes                 | No / No                                        | Yes / No                        | Yes / Yes                               | Yes / Yes                                         | 3 / 2       |
| Haren, 2005     | Yes / Yes                 | Yes / Yes                                      | Yes / Yes                       | Yes / No                                | Yes / Yes                                         | 5 / 3       |
| Seidman, 2005   | Yes / Yes                 | Yes / Yes                                      | Yes / Yes                       | Yes / Yes                               | Yes / Yes                                         | 5 / 5       |
| Orengo, 2005    | Yes / Yes                 | Yes / Yes                                      | Yes / Yes                       | No / No                                 | Yes / Yes                                         | 3 / 3       |
| Lu, 2006        | Yes / Yes                 | No / No                                        | Yes / Yes                       | Yes / Yes                               | Yes / Yes                                         | 3 / 3       |
| Vaughan, 2007   | Yes / Yes                 | Yes / Yes                                      | Yes / No                        | Yes / Yes                               | Yes / Yes                                         | 5 / 3       |
| Svartberg, 2008 | Yes / Yes                 | No / No                                        | Yes / Yes                       | Yes / Yes                               | Yes / Yes                                         | 3 / 3       |
| Seidman, 2009   | Yes / Yes                 | Yes / Yes                                      | Yes / Yes                       | Yes / Yes                               | Yes / Yes                                         | 5 / 5       |
| Shores, 2009    | Yes / Yes                 | Yes / Yes                                      | Yes / Yes                       | Yes / Yes                               | Yes / Yes                                         | 5 / 5       |
| Giltay, 2010    | Yes / Yes                 | No / Yes                                       | Yes / Yes                       | Yes / Yes                               | Yes / Yes                                         | 3 / 5       |
| Pope, 2010      | Yes / Yes                 | Yes / Yes                                      | Yes / Yes                       | Yes / Yes                               | Yes / Yes                                         | 5 / 5       |
| Stout, 2012     | Yes / Yes                 | Yes / Yes                                      | Yes / Yes                       | Yes / No                                | Yes / Yes                                         | 5 / 3       |
| Zhang, 2012     | Yes / Yes                 | No / No                                        | No / No                         | Yes / Yes                               | No / no                                           | 1 / 1       |
| Hackett, 2013   | Yes / Yes                 | No / Yes                                       | Yes / Yes                       | Yes / No                                | Yes / Yes                                         | 3 / 3       |
| Mirdamadi, 2014 | Yes / Yes                 | No / No                                        | Yes / Yes                       | Yes / No                                | No / Yes                                          | 2 / 1       |
| Borst, 2014     | Yes / Yes                 | No / No                                        | Yes / No                        | Yes / No                                | Yes / Yes                                         | 3 / 0       |
| Cherrier, 2015  | Yes / Yes                 | Yes / Yes                                      | Yes / Yes                       | Yes / Yes                               | Yes / Yes                                         | 5 / 5       |
| Snyder, 2016    | Yes / Yes                 | Yes / Yes                                      | Yes / Yes                       | Yes / Yes                               | Yes / Yes                                         | 5 / 5       |

**eTable 4. Psychometric Instruments With Cut-off Levels According to Authors**

| Measure       | Cut-off |                 |
|---------------|---------|-----------------|
|               | Mild    | Moderate-Severe |
| <b>BDI-I</b>  | 10-18   | 19-29           |
| <b>BDI-II</b> | 14-19   | 20-28           |
| <b>HDRS</b>   | 8-16    | 17-23           |
| <b>MADRS</b>  | 7-19    | 20-34           |
| <b>PHQ-9</b>  | 5-9     | 10-14           |
| <b>GDS-15</b> | 5-9     | 10-15           |
| <b>GDS-30</b> | 10-19   | 20-30           |
| <b>BRMS</b>   | 11-14   | 15-24           |
| <b>HADS-D</b> | 8-10    | >11             |

Note: Cut-off levels are based on test instructions of the psychometric tests.<sup>29-38</sup>



**eTable 5. Extraction and Derivation of Central Tendency, Dispersion Measures, and Hedges' *g***

Larry Hedges (1981) proposed the following standardized effect measure for continuous outcomes of two treatment groups A and B:

$$g = (M_A - M_B) / SD^*$$

where *M* denotes the mean outcome in the respective treatment group and *SD\** denotes the pooled standard deviation that is weighted based on their sample sizes *N*:

$$SD^* = [(N_A - 1) * SD_A^2 + (N_B - 1) * SD_B^2 / (N_A + N_B - 2)]^{0.5}$$

To calculate *g*, the measures of central tendency *M<sub>A</sub>* and *M<sub>B</sub>*, and the dispersion measures *SD<sub>A</sub>* and *SD<sub>B</sub>* were either directly extracted from all included RCTs, or derived based on other reported data as described in the following table:

| Author, year    | Depression scale | Extracted central tendency                                                                                                                                    | Derived central tendency | Extracted dispersion                                                                                                                                                                                      | Derived dispersion                                                                                                                                                        |
|-----------------|------------------|---------------------------------------------------------------------------------------------------------------------------------------------------------------|--------------------------|-----------------------------------------------------------------------------------------------------------------------------------------------------------------------------------------------------------|---------------------------------------------------------------------------------------------------------------------------------------------------------------------------|
| Grinspoon, 2000 | BDI-I            | Last paragraph of results section ("Effects of testosterone administration"): <i>M</i> for each group. 9.2 for intervention group vs. 10.8 for control group. | No derivation necessary. | Last paragraph of results section ("Effects of testosterone administration"): Baseline and post-treatment <i>SE</i> for each group. 1.4 and 1.5 for intervention group vs. 1.6 and 1.6 for control group. | Baseline and post-treatment dispersion measures were pooled. Conversion by means of formula: $SD = SE * \sqrt{n}$ 6.03 for intervention group vs. 6.79 for control group. |
| Rabkin, 2000    | BDI-I            | Table 2. Measures "controlled for baseline values". <i>M</i> for each group. 7.2 vs. 10.8.                                                                    | No derivation necessary. | Table 1 (baseline dispersion) and Table 2 (post-treatment dispersion). 8 <i>SD</i> vs. 1.1 <i>SE</i> (6.78 <i>SD</i> ) and 9.6 <i>SD</i> vs. 1.1 <i>SE</i> (6.22 <i>SD</i> ).                             | Baseline and post-treatment dispersion measures were pooled. Conversion by means of formula: $SD = SE * \sqrt{n}$ 7.39 vs. 7.91.                                          |
| Rabkin, 2000    | HDRS             | Table 2. Measures "controlled for baseline values".                                                                                                           | No derivation necessary. | Table 1 (baseline dispersion) and Table 2 (post-treatment                                                                                                                                                 | Baseline and post-treatment dispersion measures were pooled.                                                                                                              |

|                      |        |                                                                                                                                                           |                                                                                                                                                                                                                                                                                                                                                                                                                                                                                                                                                                                 |                                                                                                                                 |                                                                                                            |
|----------------------|--------|-----------------------------------------------------------------------------------------------------------------------------------------------------------|---------------------------------------------------------------------------------------------------------------------------------------------------------------------------------------------------------------------------------------------------------------------------------------------------------------------------------------------------------------------------------------------------------------------------------------------------------------------------------------------------------------------------------------------------------------------------------|---------------------------------------------------------------------------------------------------------------------------------|------------------------------------------------------------------------------------------------------------|
|                      |        | <i>M</i> for each group.<br>3.3 vs. 6.4.                                                                                                                  |                                                                                                                                                                                                                                                                                                                                                                                                                                                                                                                                                                                 | dispersion).<br>6.4 <i>SD</i> vs. 0.7 <i>SE</i> (4.93 <i>SD</i> )<br>and 5.8 <i>SD</i> vs. 0.8 <i>SE</i> (4.53 <i>SD</i> ).     | Conversion by means of formula:<br>$SD = SE * \sqrt{n}$<br>5.35 vs. 5.17.                                  |
| <b>Pope, 2000</b>    | HDRS   | Table 2. <i>M</i> for each group.<br>0.8 vs. 0.8.                                                                                                         | No derivation necessary.                                                                                                                                                                                                                                                                                                                                                                                                                                                                                                                                                        | Table 2. Baseline and post-treatment dispersion measures. 1.6 <i>SD</i> vs. 1.4 <i>SD</i> and 1.6 <i>SD</i> vs. 1.2 <i>SD</i> . | Baseline and post-treatment dispersion measures were pooled. 1.5 <i>SD</i> vs. 1.4 <i>SD</i> .             |
| <b>Seidman, 2001</b> | BDI-I  | Table 1. Baseline scores for each group: 23.5 vs. 19.3<br>Results section, paragraph "Depression severity" change scores for each group: -8.8 vs. -7.2    | Addition of baseline and change scores yields <i>M</i> for each group.<br>14.7 vs. 12.1                                                                                                                                                                                                                                                                                                                                                                                                                                                                                         | Table 1. 8.6 <i>SD</i> vs. 7 <i>SD</i> .                                                                                        | <i>SDs</i> represent baseline dispersion measures as post treatment dispersion measures were not reported. |
| <b>Seidman, 2001</b> | HDRS   | Table 1. Baseline scores for each group: 22.23 vs. 20.1<br>Results section, paragraph "Depression severity" change scores for each group: -10.1 vs. -10.5 | Addition of baseline and change scores yields <i>M</i> for each group.<br>12.13 vs. 9.6                                                                                                                                                                                                                                                                                                                                                                                                                                                                                         | Table 1. 5.1 <i>SD</i> vs. 4.7 <i>SD</i>                                                                                        | <i>SDs</i> represent baseline dispersion measures as post-treatment dispersion measures were not reported. |
| <b>Pope, 2003</b>    | BDI-II | Table 1. Baseline scores for each group: 23.1 vs. 23.6<br>Table 3. Change scores for each group: -5.5 vs. -2                                              | Addition of baseline and change scores yields <i>M</i> for each group.<br>17.6 vs. 21.6                                                                                                                                                                                                                                                                                                                                                                                                                                                                                         | Table 1. 4.3 <i>SD</i> vs. 7 <i>SD</i>                                                                                          | <i>SDs</i> represent baseline dispersion measures as post-treatment dispersion measures were not reported. |
| <b>Pope, 2003</b>    | HDRS   | Table 1. Baseline scores for each group: 21.8 vs. 21.3<br>Table 3. Change scores for each group: -7.4 vs. -0.3                                            | Addition of baseline and change scores yields <i>M</i> for each group.<br>14.4 vs. 21                                                                                                                                                                                                                                                                                                                                                                                                                                                                                           | Table 1. 5.9 <i>SD</i> vs. 4.1 <i>SD</i>                                                                                        | <i>SDs</i> represent baseline dispersion measures as post-treatment dispersion measures were not reported. |
| <b>Malkin, 2004</b>  | BDI-II | Table 3. <i>M</i> for each group.<br>4 vs. 7                                                                                                              | No derivation necessary.                                                                                                                                                                                                                                                                                                                                                                                                                                                                                                                                                        | Table 3. 5.1 <i>SD</i> vs. 5.75 <i>SD</i>                                                                                       | No derivation necessary.                                                                                   |
| <b>Pugh, 2004</b>    | BDI-II | Third paragraph in results section. Data only reported for intervention group.                                                                            | Imputation of missing central tendency and dispersion using the following procedure:<br>#assume successful randomization so that baseline BDI(treatment) = BDI(control)<br>7.3 - 1.6 #mean post-treatment BDI score (treatment group)<br>7.3 - 1.5 #mean post-treatment BDI score (control group)<br>6 #sd post treatment BDI score (treatment group)<br>$\rho \leftarrow (7.3^2 + 6^2 - 0.7^2) / (2*7.3^2 + 6^2)$ #common recovered pre-post correlation<br>7.3 #assumed sd baseline BDI scores (control group)<br>6.1 #recovered sd post-treatment BDI scores (control group) |                                                                                                                                 |                                                                                                            |

|                        |        |                                                                                                                                                                                                                                                                                                                                                                                                                                                                                                                                                                                                                                                                                                                                                                                                                                                                                                                                                                                                                                                                                                                                                                                                                                                                                                                                                                                                                                                                                                                                                                                                                                                                                                                        |                                                            |                                                                                             |                                                                            |
|------------------------|--------|------------------------------------------------------------------------------------------------------------------------------------------------------------------------------------------------------------------------------------------------------------------------------------------------------------------------------------------------------------------------------------------------------------------------------------------------------------------------------------------------------------------------------------------------------------------------------------------------------------------------------------------------------------------------------------------------------------------------------------------------------------------------------------------------------------------------------------------------------------------------------------------------------------------------------------------------------------------------------------------------------------------------------------------------------------------------------------------------------------------------------------------------------------------------------------------------------------------------------------------------------------------------------------------------------------------------------------------------------------------------------------------------------------------------------------------------------------------------------------------------------------------------------------------------------------------------------------------------------------------------------------------------------------------------------------------------------------------------|------------------------------------------------------------|---------------------------------------------------------------------------------------------|----------------------------------------------------------------------------|
| <b>Kenny, 2004</b>     | GDS-15 | Table 3. <i>M</i> for each group.<br>1.4 vs. 4                                                                                                                                                                                                                                                                                                                                                                                                                                                                                                                                                                                                                                                                                                                                                                                                                                                                                                                                                                                                                                                                                                                                                                                                                                                                                                                                                                                                                                                                                                                                                                                                                                                                         | No derivation necessary.                                   | Table 3. Baseline and post-treatment <i>SD</i> for each group.<br>1.8 and 1.1 vs. 3.6 and 3 | Pooled <i>SD</i> for each group.<br>1.45 vs. 3.3                           |
| <b>Rabkin, 2004</b>    | HDRS   | <p>Imputation of central tendencies and dispersions using the following procedure:</p> <pre> sims &lt;- 1000000 #simulate baseline HDRS scores based on reported moments treat &lt;- rbinom(sims, size = round(17.8^2 / (17.8-4.2^2)), prob = 1 - (4.2^2 / 17.8)) ctrl &lt;- rbinom(sims, size = round(16.8^2 / (16.8-3.3^2)), prob = 1 - (3.3^2 / 16.8)) par(mfrow=c(1,2)); hist(treat); hist(ctrl)  #estimate SD of HDRS change assuming r(pre,post) = 0.75 and variance homogeneity streat &lt;- 4.2*sqrt(2*(1-0.75)) sctrl &lt;- 3.3*sqrt(2*(1-0.75))  #estimate mean HDRS changes to approximate the reported response rates (see Furukawa et al., 2005) library(GA) optfun &lt;- function(p){   set.seed(1234)   ptreat &lt;- treat - rnorm(sims, p[1], streat)   ptreat &lt;- ifelse(ptreat &lt; 0, 0, round(ptreat))   pctrl &lt;- treat - rnorm(sims, p[2], sctrl)   pctrl &lt;- ifelse(pctrl &lt; 0, 0, round(pctrl))   -1*(((sum(ptreat &lt; 0.5*treat) / sims) - 0.61)^2 + ((sum(pctrl &lt; 0.5*ctrl) / sims) - 0.51)^2) } fit &lt;- ga(type="real-valued", fitness = optfun, min=c(0,0), max=c(17.8,16.8), maxiter = 10) #suitable parameter set: p = c(10.13, 9.59)  #simulate post treatment HRDS scores set.seed(1234) ptreat &lt;- treat - rnorm(sims, fit@solution[1,1], streat); ptreat &lt;- ifelse(ptreat &lt; 0, 0, round(ptreat)) pctrl &lt;- treat - rnorm(sims, fit@solution[1,2], sctrl); pctrl &lt;- ifelse(pctrl &lt; 0, 0, round(pctrl)) par(mfrow=c(1,2)); hist(ptreat); hist(pctrl)  #calculate moments of post-treatment HRDS scores and response rates mean(ptreat); sd(ptreat); (sum(ptreat &lt; 0.5*treat) / sims) mean(pctrl); sd(pctrl); (sum(pctrl &lt; 0.5*ctrl) / sims) </pre> |                                                            |                                                                                             |                                                                            |
| <b>Cavallini, 2004</b> | BRMS   | Table 1. <i>Mdn</i> for each group.<br>5 vs. 7                                                                                                                                                                                                                                                                                                                                                                                                                                                                                                                                                                                                                                                                                                                                                                                                                                                                                                                                                                                                                                                                                                                                                                                                                                                                                                                                                                                                                                                                                                                                                                                                                                                                         | Imputation sensu Hozo et al. (2005); <i>M</i> = <i>Mdn</i> | Table 1. Baseline and post-treatment ranges for each group. 5-8 vs. 5-8 and 3-6 vs. 5-8     | Imputation sensu Hozo et al. (2005); Pooled <i>SDs</i> = Ranges / 4 = 0.75 |
| <b>Haren, 2005</b>     | GDS-30 | Table 4. Baseline scores for each group: 6.28 vs. 5.7                                                                                                                                                                                                                                                                                                                                                                                                                                                                                                                                                                                                                                                                                                                                                                                                                                                                                                                                                                                                                                                                                                                                                                                                                                                                                                                                                                                                                                                                                                                                                                                                                                                                  | Addition of baseline and change scores yields <i>M</i> for | Table 1. 3.8 <i>SD</i> vs. 4.4 <i>SD</i>                                                    | <i>SDs</i> represent baseline dispersion measures as post-treatment        |

|                        |        |                                                                                                                                                |                                          |                                                                                                                                                                                                                                                                                                                                                                                                   |                                                                                                                                           |
|------------------------|--------|------------------------------------------------------------------------------------------------------------------------------------------------|------------------------------------------|---------------------------------------------------------------------------------------------------------------------------------------------------------------------------------------------------------------------------------------------------------------------------------------------------------------------------------------------------------------------------------------------------|-------------------------------------------------------------------------------------------------------------------------------------------|
|                        |        | Change scores for each group:<br>-0.95 vs. -1.27                                                                                               | each group.<br>5.33 vs. 4.43             |                                                                                                                                                                                                                                                                                                                                                                                                   | dispersion measures were not reported.                                                                                                    |
| <b>Seidman, 2005</b>   | HDRS   | Results section, paragraph "Depression severity".<br><i>M</i> for each group.<br>14.4 vs. 15.2                                                 | No derivation necessary.                 | Results section, paragraph "Depression severity".<br>9.1 <i>SD</i> vs. 9.1 <i>SD</i>                                                                                                                                                                                                                                                                                                              | <i>SDs</i> represent post-treatment dispersion measures as baseline dispersion measures were not reported.                                |
| <b>Orengo, 2005</b>    | HDRS   | Results section, second paragraph.<br><i>M</i> for each group.<br>9.2 vs. 10.4                                                                 | No derivation necessary.                 | Results section, second paragraph.<br>4.1 <i>SD</i> vs. 5.4 <i>SD</i>                                                                                                                                                                                                                                                                                                                             | No derivation necessary.                                                                                                                  |
| <b>Lu, 2006</b>        | BDI-I  | Table 3. <i>M</i> for each group.<br>6.5 vs. 9.1                                                                                               | No derivation necessary.                 | Table 3. Pre and post <i>SD</i> for each group.<br>4.3 and 2.5 vs. 4.9 and 3.8                                                                                                                                                                                                                                                                                                                    | Pooled <i>SD</i> for each group.<br>3.4 vs. 4.35                                                                                          |
| <b>Vaughan, 2007</b>   | BDI-I  | Table 1. <i>M</i> for each group.<br>3.1 vs. 4.8                                                                                               | No derivation necessary.                 | Table 1. Baseline and post-treatment <i>SE</i> for each group.<br>0.6 and 0.6 vs. 1 and 1.2                                                                                                                                                                                                                                                                                                       | Baseline and post-treatment dispersion <i>SE</i> were pooled. Conversion by means of formula:<br>$SD = SE * \sqrt{n}$<br>2.71 vs. 4.72    |
| <b>Svartberg, 2008</b> | BDI-II | Table 4. <i>M</i> for each group.<br>3.8 vs. 4.3                                                                                               | No derivation necessary.                 | Table 4. Baseline and post-treatment <i>SD</i> for each group.<br>4.3 vs. 4.8 and 1.3 vs. 2.8                                                                                                                                                                                                                                                                                                     | Pooled <i>SD</i> for each group.<br>4.55 vs. 2.05                                                                                         |
| <b>Seidman, 2009</b>   | HDRS   | Figure 1. Data extraction using WebPlot Digitizer.                                                                                             | <i>M</i> for each group.<br>6.9 vs. 11.7 | Table 1. Single post-treatment scores of subjects.                                                                                                                                                                                                                                                                                                                                                | Manual calculation of <i>SD</i> by taking single post-treatment scores of each participant using R statistical software.<br>4.11 vs. 6.14 |
| <b>Shores, 2009</b>    | HDRS   | Table 2. <i>M</i> for each group.<br>8.4 vs. 11.4                                                                                              | No derivation necessary.                 | Table 2. Baseline and post-treatment <i>SD</i> for each group.<br>3.4 vs. 5 and 4.4 vs. 4.4                                                                                                                                                                                                                                                                                                       | Pooled <i>SD</i> for each group.<br>4.2 vs. 4.4                                                                                           |
| <b>Giltay, 2010</b>    | BDI-I  | Table 2. <i>M</i> for each group adjusted for age, body mass index, smoking status, total testosterone level, and prevalent diabetes mellitus. | No derivation necessary.                 | Table 2. 95% CI. Calculation of <i>SDs</i> based on reported data:<br>$(\text{mean}(c(\text{abs}(6.1 - 7.3), \text{abs}(6.1 - 5.1))) / \text{qnorm}(0.975)) * \text{sqrt}(113-1)$ #SD of post-treatment BDI score (treatment group)<br>$(\text{mean}(c(\text{abs}(7.2 - 5.8), \text{abs}(7.2 - 9.0))) / \text{qnorm}(0.975)) * \text{sqrt}(65-1)$ #SD of post-treatment BDI score (control group) |                                                                                                                                           |

|                        |        |                                                                                                                                                         |                                                                                      |                                                                                                    |                                                                                                                                      |
|------------------------|--------|---------------------------------------------------------------------------------------------------------------------------------------------------------|--------------------------------------------------------------------------------------|----------------------------------------------------------------------------------------------------|--------------------------------------------------------------------------------------------------------------------------------------|
|                        |        | 6 vs. 7.7                                                                                                                                               |                                                                                      |                                                                                                    |                                                                                                                                      |
| <b>Pope, 2010</b>      | HDRS   | Table 2. LOCF method for missing data on the participants with at least one post-baseline evaluation. <i>M</i> for each group. 13.4 vs. 15.2            | No derivation necessary.                                                             | Table 1 (baseline <i>SD</i> ) and Table 2 (post-treatment <i>SD</i> ). 3.8 vs. 7.1 and 4.2 vs. 6.3 | Pooled <i>SD</i> for each group. 5.45 vs. 5.25                                                                                       |
| <b>Pope, 2010</b>      | MADRS  | Table 2. LOCF method for missing data on the participants with at least one post-baseline evaluation. <i>M</i> for each group. 17.9 vs. 19.7            | No derivation necessary.                                                             | Table 1 (baseline <i>SD</i> ) and Table 2 (post-treatment <i>SD</i> ). 6.3 vs. 9.1 and 5.9 vs. 8.5 | Pooled <i>SD</i> for each group. 7.7 vs. 7.2                                                                                         |
| <b>Stout, 2012</b>     | BDI-II | Table 5. <i>M</i> for each group. 6.6 vs. 7.1                                                                                                           | No derivation necessary.                                                             | Table 5. Baseline and post-treatment <i>SD</i> for each group. 8.7 vs. 3.8 and 5.2 vs. 3.4         | Pooled <i>SD</i> for each group. 6.25 vs. 4.3                                                                                        |
| <b>Zhang, 2012</b>     | HADS-D | Table 2 and 3. <i>M</i> for each group. 2.39 vs. 4.29                                                                                                   | No derivation necessary.                                                             | Table 2 and 3. Baseline and post-treatment <i>SE</i> for each group. 0.6 vs. 0.3 and 0.6 vs. 0.7   | Baseline and post-treatment dispersion <i>SE</i> were pooled. Conversion by means of formula: $SD = SE * \sqrt{n}$<br>4.02 vs. 5.81. |
| <b>Hackett, 2013</b>   | HADS-D | Table 1. Baseline scores for each group: 7.9 vs. 7.26<br>Results section, "Depression and Anxiety Scores" change scores for each group: -1.05 vs. -0.41 | Addition of baseline and change scores yields <i>M</i> for each group. 6.85 vs. 6.85 | Table 1. Baseline <i>SD</i> for each group. 3.91 vs. 4.1                                           | <i>SDs</i> represent baseline dispersion measures as post-treatment dispersion measures were not reported.                           |
| <b>Mirdamadi, 2014</b> | BDI-I  | Table 4. <i>M</i> for each group. 5 vs. 5.55                                                                                                            | No derivation necessary.                                                             | Table 4. Baseline and post-treatment <i>SD</i> for each group. 4.41 vs. 6.28 and 3.14 vs. 5.5      | Pooled <i>SD</i> for each group. 5.35 vs. 4.32                                                                                       |
| <b>Borst, 2014</b>     | GDS-15 | Table 2. <i>M</i> for each group. 0.88 vs. 2.92                                                                                                         | No derivation necessary.                                                             | Table 2. Baseline and post-treatment <i>SD</i> for each group. 1.76 vs. 0.64 and 1.93 vs. 3.26.    | Pooled <i>SD</i> for each group. 1.2 vs. 2.6                                                                                         |
| <b>Cherrier, 2015</b>  | GDS-30 | Table 3. <i>M</i> for each group.                                                                                                                       | No derivation necessary                                                              | Table 3. Baseline <i>SE</i> for each                                                               | Only baseline <i>SEs</i> were reported.                                                                                              |

|                     |       |                                                                                                     |                                                                                       |                                                        |                                                                                                            |
|---------------------|-------|-----------------------------------------------------------------------------------------------------|---------------------------------------------------------------------------------------|--------------------------------------------------------|------------------------------------------------------------------------------------------------------------|
|                     |       | 4.4 vs. 6.8                                                                                         |                                                                                       | group.<br>1.3 vs. 1.2                                  | Conversion by means of formula:<br>$SD = SE * \sqrt{n}$<br>4.11 vs. 4.16                                   |
| <b>Snyder, 2016</b> | PHQ-9 | Table 3. Baseline scores for each group: 6.6 vs. 6.6<br>Change scores for each group: -1.8 vs. -1.1 | Addition of baseline and change scores yields <i>M</i> for each group.<br>4.8 vs. 5.5 | Table 3. Baseline <i>SD</i> for each group.<br>4 vs. 4 | <i>SDs</i> represent baseline dispersion measures as post-treatment dispersion measures were not reported. |

**eFigure 1. Forest plot of Treatment Acceptability**

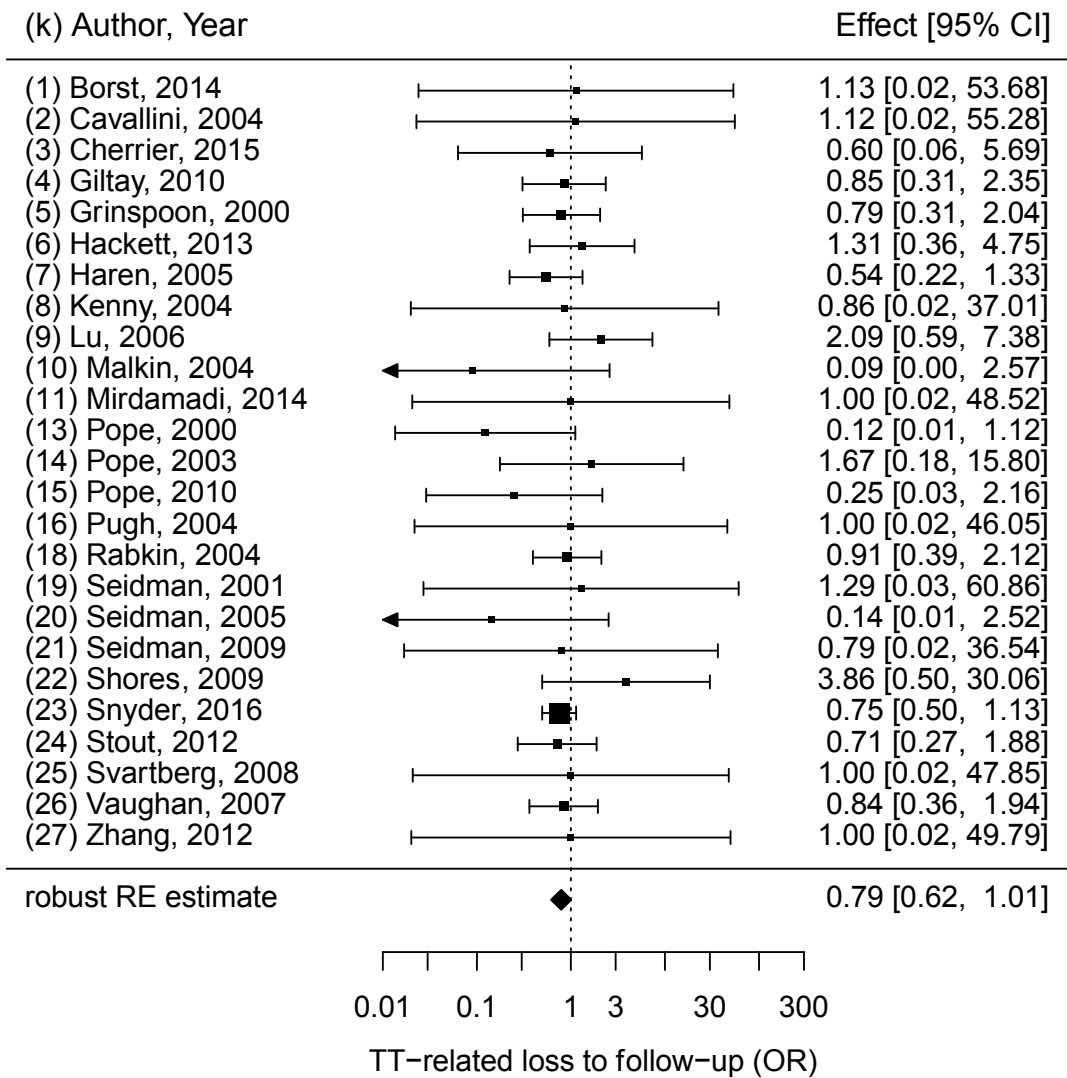

Acceptability of TT (odds ratio of loss to follow-up) in the respective study, and their meta-analytical estimate. Estimates below 1 represent less loss in response to TT as compared to placebo.

**eTable 6. Robust Meta-regression of the Effectiveness of Testosterone Treatment (TT) on Various Study-Level Moderators After Removal of Influential Studies**

|                                  | Prediction    |          |       |                    |                     | NHST |               |       |
|----------------------------------|---------------|----------|-------|--------------------|---------------------|------|---------------|-------|
|                                  | Manifestation | Estimate | SE    | CI <sub>2.5%</sub> | CI <sub>97.5%</sub> | N    | $\chi^2$ (df) | p     |
| <i>Baseline characteristics</i>  |               |          |       |                    |                     |      |               |       |
| mean age                         | 40 years      | 0.159    | 0.080 | 0.002              | 0.316               | 26   | 0.817 (1)     | 0.366 |
|                                  | 60 years      | 0.227    | 0.057 | 0.115              | 0.340               |      |               |       |
|                                  | 80 years      | 0.296    | 0.108 | 0.084              | 0.508               |      |               |       |
| Testosterone status              | eugonadal     | 0.122    | 0.096 | -0.067             | 0.310               | 24   | 1.389 (1)     | 0.239 |
|                                  | hypogonadal   | 0.260    | 0.067 | 0.129              | 0.391               |      |               |       |
| HIV infection                    | yes           | 0.284    | 0.172 | -0.052             | 0.620               | 26   | 0.200 (1)     | 0.655 |
|                                  | no            | 0.203    | 0.058 | 0.090              | 0.316               |      |               |       |
| symptomatology level             | severe        | 0.460    | 0.138 | 0.191              | 0.730               | 19   | 3.926 (2)     | 0.140 |
|                                  | mild          | 0.198    | 0.057 | 0.086              | 0.309               |      |               |       |
|                                  | subclinical   | 0.698    | 0.507 | -0.297             | 1.692               |      |               |       |
| symptom variability (CV)         | 20 %          | 0.167    | 0.114 | -0.057             | 0.391               | 25   | 0.358 (1)     | 0.550 |
|                                  | 50 %          | 0.212    | 0.057 | 0.100              | 0.324               |      |               |       |
|                                  | 100 %         | 0.286    | 0.108 | 0.075              | 0.497               |      |               |       |
| <i>Treatment characteristics</i> |               |          |       |                    |                     |      |               |       |
| treatment dose                   | 0.1 g / week  | 0.123    | 0.087 | -0.047             | 0.293               | 24   | 2.703 (1)     | 0.100 |
|                                  | 0.3 g / week  | 0.244    | 0.062 | 0.122              | 0.365               |      |               |       |
|                                  | 1.0 g / week  | 0.667    | 0.276 | 0.127              | 1.207               |      |               |       |
| treatment duration               | 5 weeks       | 0.208    | 0.073 | 0.064              | 0.352               | 26   | 0.017 (1)     | 0.896 |
|                                  | 20 weeks      | 0.213    | 0.058 | 0.100              | 0.326               |      |               |       |
|                                  | 100 weeks     | 0.238    | 0.184 | -0.123             | 0.598               |      |               |       |
| administration                   | intramuscular | 0.143    | 0.065 | 0.015              | 0.272               | 22   | 3.477 (2)     | 0.062 |
|                                  | oral          | –        | –     | –                  | –                   |      |               |       |
|                                  | transdermal   | 0.439    | 0.144 | 0.156              | 0.722               |      |               |       |

Note. CV = coefficient of variation, SE = standard error, CI = confidence interval, NHST = null-hypothesis significance test



## eReferences

1. Grinspoon S, Corcoran C, Stanley T, et al. Effects of Hypogonadism and Testosterone Administration on Depression Indices in HIV-Infected Men. *J Clin Endocrinol Metab*. 2000;85(1):60-65.
2. Rabkin JG, Wagner GJ, Rabkin R. A double-blind, placebo-controlled trial of testosterone therapy for HIV-positive men with hypogonadal symptoms. *Arch Gen Psychiatry*. 2000;57(2):141-7; discussion 155-6. doi:10.1001/archpsyc.57.2.141.
3. Haren MT, Wittert GA, Chapman IM, Coates P, Morley JE. Effect of oral testosterone undecanoate on visuospatial cognition, mood and quality of life in elderly men with low-normal gonadal status. *Maturitas*. 2005;50:124-133. doi:10.1016/j.maturitas.2004.05.002.
4. Seidman SN, Miyazaki M, Roose SP. Intramuscular testosterone supplementation to selective serotonin reuptake inhibitor in treatment-resistant depressed men: Randomized placebo-controlled clinical trial. *J Clin Psychopharmacol*. 2005;25(6):584-588. doi:10.1097/01.jcp.0000185424.23515.e5.
5. Orengo CA, Fullerton L, Kunik ME. Safety and efficacy of testosterone gel 1% augmentation in depressed men with partial response to antidepressant therapy. *J Geriatr Psychiatry Neurol*. 2005;18(1):20-24. doi:10.1177/0891988704271767.
6. Lu H, Masterman A, Mulnard R, et al. Effects of Testosterone on Cognition and Mood in Male Patients With Mild Alzheimer Disease and Healthy Elderly Men. *Arch Neurol*. 2006;63(2):177.
7. Vaughan C, Goldstein FC, Tenover JL. Exogenous testosterone alone or with finasteride does not improve measurements of cognition in healthy older men with low serum testosterone. *J Androl*. 2007;28(6):875-882. doi:10.2164/jandrol.107.002931.
8. Svartberg J, Agledahl I, Figenschau Y, Sildnes T, Waterloo K, Jorde R. Testosterone treatment in elderly men with subnormal testosterone levels improves body composition and BMD in the hip. *Int J Impot Res*. 2008;20(4):378-387. doi:10.1038/ijir.2008.19.
9. Seidman SN, Orr G, Raviv G, et al. Effects of Testosterone Replacement in Middle-Aged Men With Dysthymia. *J Clin Psychopharmacol*. 2009;29(3):216-221. doi:10.1097/JCP.0b013e3181a39137.
10. Shores MM, Kivlahan DR, Sadak TI, Li EJ, Matsumoto AM. A randomized, double-blind, placebo-controlled study of testosterone treatment in hypogonadal older men with subthreshold depression (dysthymia or minor depression). *J Clin Psychiatry*. 2009;70(7):1009-1016. doi:10.4088/JCP.08m04478.
11. Giltay EJ, Tishova YA, Mskhalaya GJ, Gooren LJG, Saad F, Kalinchenko SY. Effects of Testosterone Supplementation on Depressive Symptoms and Sexual Dysfunction in Hypogonadal Men with the Metabolic Syndrome. *J Sex Med*. 2010;7(7):2572-2582. doi:10.1111/j.1743-6109.2010.01859.x.
12. Pope HG, Amiaz R, Brennan BP, et al. Parallel-group placebo-controlled trial of testosterone gel in men with major depressive disorder displaying an incomplete response to standard antidepressant treatment. *J Clin Psychopharmacol*. 2010;30(2):126-134. doi:10.1097/JCP.0b013e3181d207ca.
13. Pope HG, Kouri EM, Hudson JI. Effects of supraphysiologic doses of testosterone on mood and aggression in normal men: A randomized controlled trial. *Arch Gen Psychiatry*. 2000;57(2):133-140; discussion 155-156. doi:10.1001/archpsyc.57.2.133.
14. Stout M, Tew GA, Doll H, et al. Testosterone therapy during exercise rehabilitation in

- male patients with chronic heart failure who have low testosterone status: A double-blind randomized controlled feasibility study. *Am Heart J*. 2012;164(6):893-901. doi:10.1016/j.ahj.2012.09.016.
15. Zhang X wei, Liu Z hua, Hu X wei, et al. Androgen replacement therapy improves psychological distress and health-related quality of life in late onset hypogonadism patients in Chinese population. *Chin Med J (Engl)*. 2012;125(21):3806-3810. doi:10.3760/cma.j.issn.0366-6999.2012.21.011.
  16. Hackett G, Cole N, Bhartia M, Kennedy D, Raju J, Wilkinson P. Testosterone Replacement Therapy with Long-Acting Testosterone Undecanoate Improves Sexual Function and Quality-of-Life Parameters vs. Placebo in a Population of Men with Type 2 Diabetes. *J Sex Med*. 2013;10(6):1612-1627. doi:10.1111/jsm.12146.
  17. Mirdamadi A, Garakyaraghi M, Pourmoghaddas A, Bahmani A, Mahmoudi H, Gharipour M. Beneficial effects of testosterone therapy on functional capacity, cardiovascular parameters, and quality of life in patients with congestive heart failure. *Biomed Res Int*. 2014;2014(392432). doi:http://dx.doi.org/10.1155/2014/392432.
  18. Borst SE, Yarrow JF, Fernandez C, et al. Cognitive effects of testosterone and finasteride administration in older Hypogonadal men. *Clin Interv Aging*. 2014;9:1327-1333. doi:10.2147/CIA.S61760.
  19. Cherrier MM, Anderson K, Shofer J, Millard S, Matsumoto AM. Testosterone treatment of men with mild cognitive impairment and low testosterone levels. *Am J Alzheimers Dis Other Demen*. 2015;30(4):421-430. doi:10.1177/1533317514556874.
  20. Snyder PJ, Bhasin S, Cunningham GR, et al. Effects of testosterone treatment in older men. *N Engl J Med*. 2016;374(7):611-624. doi:10.1056/NEJMoa1506119.
  21. Seidman S, Spatz E, Rizzo C, Roose S. Testosterone Replacement Therapy for Hypogonadal Men With Major Depressive Disorder: A Randomized, Placebo-Controlled Clinical Trial. *J Clin Psychiatry*. 2001;157(11):1884. doi:10.1176/appi.ajp.157.11.1884.
  22. Pope HG, Cohane GH, Kanayama G, et al. Testosterone Gel Supplementation for Men With Refractory Depression : A Randomized, Placebo-controlled Trial. *Am J Psychiatry*. 2003;160(15):105-111.
  23. Malkin CJ, Pugh PJ, Morris PD, et al. Testosterone replacement in hypogonadal men with angina improves ischaemic threshold and quality of life. *Heart*. 2004;90(8):871-876. doi:10.1136/hrt.2003.021121.
  24. Pugh PJ, Jones R, West JN, Jones TH, Channer KS. Testosterone treatment for men with chronic heart failure. *Heart*. 2004;90(4):446-447. doi:10.1136/hrt.2003.014639.
  25. Kenny AM, Fabregas G, Song C, Biskup B, Bellantonio S. Effects of testosterone on behavior, depression, and cognitive function in older men with mild cognitive loss. *J Gerontol A Biol Sci Med Sci*. 2004;59(1):75-78. <http://onlinelibrary.wiley.com/o/cochrane/clcentral/articles/005/CN-00460005/frame.html>.
  26. Rabkin JG, Wagner GJ, McElhiney MC, Rabkin R, Lin SH. Testosterone versus fluoxetine for depression and fatigue in HIV/AIDS: A placebo-controlled trial. *J Clin Psychopharmacol*. 2004;24(4):379-385. doi:10.1097/01.jcp.0000132442.35478.3c.
  27. Cavallini G, Caracciolo S, Vitali G, Modenini F, Biagiotti G. Carnitine versus androgen administration in the treatment of sexual dysfunction, depressed mood, and fatigue associated with male aging. *Urology*. 2004;63(4):641-646. doi:10.1016/j.urology.2003.11.009.
  28. Jadad AR, Moore RA, Carroll D, et al. Assessing the Quality of Reports of Randomized

- Clinical Trials : Is Blinding Necessary ? *Control Clin Trials*. 1996;12(January 1995):1-12. doi:10.1016/0197-2456(95)00134-4.
29. Beck AT, Steer RA, Garbin MG. Psychometric properties of the Beck Depression Inventory: twenty-five years of evaluation. *Clin Psychol Rev*. 1988;8:77-100. doi:10.1016/0272-7358(88)90050-5.
  30. Bech P. *Clinical Psychometrics*. Chichester, West Sussex, UK: John Wiley & Sons; 2012.
  31. Addington D, Addington J, Schissel B. A depression rating scale for schizophrenics. *Schizophr Res*. 1990;3(4):247-251.
  32. Addington D, Addington J, Maticka-Tyndale E, Joyce J. Reliability and validity of a depression rating scale for schizophrenics. *Schizophr Res*. 1992;6(3):201-208.
  33. Kroenke K, Spitzer RL, Williams JBW. The phq-9. *J Gen Intern Med*. 2001;16(9):606-613.
  34. McDowell I. *Measuring Health: A Guide to Rating Scales and Questionnaires*. Oxford University Press, USA; 2006.
  35. Yesavage JA, Brink TL, Rose TL, et al. Development and validation of a geriatric depression screening scale: a preliminary report. *J Psychiatr Res*. 1982;17(1):37-49.
  36. Yesavage JA, Sheikh JI. Geriatric Depression Scale ( GDS ) Recent Evidence and Development of a Shorter Version. *Clin Gerontol*. 2008;7:115(1986). doi:10.1300/J018v05n01.
  37. Zigmond AS, Snaith RP. The hospital anxiety and depression scale. *Acta Psychiatr Scand*. 1983;67(6):361-370.
  38. Zimmerman M, Martinez JH, Young D, Chelminski I, Dalrymple K. Severity classification on the Hamilton depression rating scale. *J Affect Disord*. 2013;150(2):384-388.
  39. Furukawa TA, Cipriani A, Barbui C, Brambilla P, Watanabe N. Imputing response rates from means and standard deviations in meta-analyses. *Int Clin Psychopharmacol*. 2005;20(1):49-52.
  40. Hedges L V. Distribution theory for Glass's estimator of effect size and related estimators. *J Educ Stat*. 1981;6(2):107-128.
  41. Hozo SP, Djulbegovic B, Hozo I. Estimating the mean and variance from the median, range, and the size of a sample. *BMC Med Res Methodol*. 2005;5(1):13.
